# Supplementary material for: Comparing the effects of infrastructure on bicycling injury at intersections and non-intersections using a case–crossover design
Source: HighWire-hosted journal article supplement (doi:10.1136/injuryprev-2012-040561), 2013-02-14
Supplement: injuryprev-2012-040561supp_tables.pdf [file injuryprev-2012-040561supp_tables.pdf]

**Supplementary Data Table 1.** Associations between bicycling injury and infrastructural characteristics at intersections, comparison of N=210 injury sites and N=272 control sites, all at intersections. Odds ratios (OR) and 95% confidence intervals (CI) from logistic regression.

| Variable                                                | # injury sites/<br># control sites | Each variable<br>considered<br>separately<br>OR (95% CI) | Multiple regression<br>model with all<br>significant variables<br>OR (95% CI) |
|---------------------------------------------------------|------------------------------------|----------------------------------------------------------|-------------------------------------------------------------------------------|
| <b>Route types meeting at intersection</b>              |                                    |                                                          |                                                                               |
| Minor-Separated                                         | 2 / 4                              | 0.37 (0.06 – 2.46)                                       | 0.17 (0.02 – 1.43)                                                            |
| Local-Local                                             | 47 / 79                            | <b>0.34 (0.16 – 0.71)</b>                                | <b>0.19 (0.05 – 0.66)</b>                                                     |
| Major-Separated                                         | 5 / 8                              | 0.28 (0.07 – 1.41)                                       | 0.23 (0.03 – 1.60)                                                            |
| Local-Separated                                         | 9 / 8                              | 0.87 (0.21 – 3.60)                                       | 0.39 (0.05 – 2.80)                                                            |
| Major-Local                                             | 47 / 70                            | <b>0.47 (0.25 – 0.89)</b>                                | 0.44 (0.18 – 1.09)                                                            |
| Minor-Local                                             | 27 / 30                            | 0.64 (0.28 – 1.45)                                       | 0.70 (0.21 – 2.34)                                                            |
| Major-Minor                                             | 25 / 31                            | 0.76 (0.37 – 1.54)                                       | 0.72 (0.31 – 1.66)                                                            |
| Major-Major                                             | 40 / 34                            | 1 (reference)                                            | 1 (reference)                                                                 |
| Minor-Minor                                             | 8 / 8                              | 0.96 (0.29 – 3.16)                                       | 1.02 (0.23 – 4.54)                                                            |
| <b>Intersection type</b>                                |                                    |                                                          |                                                                               |
| Stop sign, 4-way                                        | 6 / 16                             | 0.42 (0.14 – 1.30)                                       | 0.76 (0.15 – 3.78)                                                            |
| Traffic light, with cyclist controls                    | 21 / 27                            | 0.73 (0.34 – 1.59)                                       | 0.78 (0.28 – 2.19)                                                            |
| Stop sign, 2-way                                        | 82 / 130                           | 0.65 (0.40 – 1.07)                                       | 1.00 (0.43 – 2.31)                                                            |
| Traffic light, with no cyclist controls                 | 70 / 79                            | 1 (reference)                                            | 1 (reference)                                                                 |
| Uncontrolled                                            | 12 / 11                            | 1.06 (0.41 – 2.75)                                       | 2.96 (0.84 – 10.48)                                                           |
| Traffic circle                                          | 19 / 9                             | 2.11 (0.79 – 5.63)                                       | <b>7.98 (1.79 – 35.57)</b>                                                    |
| <b>Motor vehicle speed (on streets)</b>                 |                                    |                                                          |                                                                               |
| ≤ 30 km/h                                               | 57 / 97                            | <b>0.61 (0.40 – 0.94)</b>                                | <b>0.52 (0.29 – 0.92)</b>                                                     |
| > 30 to 50 km/h                                         | 145 / 164                          | 1 (reference)                                            | 1 (reference)                                                                 |
| > 50 to 60 km/h                                         | 7 / 9                              | 0.72 (0.23 – 2.26)                                       | 1.15 (0.24 – 5.49)                                                            |
| > 60 km/h                                               | 1 / 2                              | 0.53 (0.04 – 6.38)                                       | 1.09 (0.07 – 16.31)                                                           |
| <b>Cyclist travel direction</b>                         |                                    |                                                          |                                                                               |
| Same as motor vehicle traffic                           | 192 / 260                          | 1 (reference)                                            | 1 (reference)                                                                 |
| Opposite to motor vehicle traffic                       | 18 / 12                            | <b>3.11 (1.11 – 8.66)</b>                                | <b>7.82 (2.02 – 30.27)</b>                                                    |
| <b>Route grade (in the direction of cyclist travel)</b> |                                    |                                                          |                                                                               |
| Uphill (≥ 1°)                                           | 24 / 68                            | 0.53 (0.27 – 1.02)                                       | 0.47 (0.22 – 1.004)                                                           |
| Flat                                                    | 68 / 101                           | 1 (reference)                                            | 1 (reference)                                                                 |
| Downhill (≤ - 1°)                                       | 118 / 103                          | <b>2.07 (1.26 – 3.40)</b>                                | <b>2.22 (1.21 – 4.08)</b>                                                     |
| <b>Cyclist traffic per hour</b>                         |                                    |                                                          |                                                                               |
| 0                                                       | 36 / 62                            | 1 (reference)                                            | 1 (reference)                                                                 |
| > 0 - 25                                                | 63 / 69                            | 1.72 (0.94 – 3.16)                                       | 2.32 (1.09 – 4.94)                                                            |
| > 25 - 75                                               | 33 / 60                            | 1.07 (0.53 – 2.16)                                       | 1.72 (0.68 – 4.32)                                                            |
| > 75                                                    | 78 / 81                            | <b>2.20 (1.06 – 4.55)</b>                                | <b>3.04 (1.17 – 7.93)</b>                                                     |
| <b>Bike or pedestrian infrastructure</b>                |                                    |                                                          |                                                                               |
| Cycle track or bike path                                | 0 / 2                              | 0 (0 - >1000)                                            | not retained in model                                                         |

|                                                                |           |                           |                       |
|----------------------------------------------------------------|-----------|---------------------------|-----------------------|
| Traffic diverter on local street                               | 7 / 12    | 0.52 (0.15 – 1.75)        |                       |
| Traffic slowing device on local street                         | 14 / 28   | 0.53 (0.22 – 1.28)        |                       |
| Bike signage only                                              | 34 / 35   | 1.12 (0.56 – 2.26)        |                       |
| Bike lane                                                      | 26 / 27   | 1.73 (0.81 – 3.69)        |                       |
| Multi-use path                                                 | 2 / 4     | 0.31 (0.03 – 3.27)        |                       |
| Sidewalk                                                       | 14 / 14   | 1.45 (0.50 – 4.16)        |                       |
| Sharrows or shared lane                                        | 6 / 7     | 1.36 (0.34 – 5.42)        |                       |
| Not in any of above categories                                 | 107 / 143 | 1 (reference)             |                       |
| <b>Streetcar or train tracks</b> (within 5 m diameter of site) |           |                           | not retained in model |
| No                                                             | 162 / 224 | 1 (reference)             |                       |
| Yes                                                            | 48 / 48   | <b>3.18 (1.30 – 7.73)</b> |                       |
| <b>Construction present</b>                                    |           |                           | not retained in model |
| No                                                             | 195 / 248 | 1 (reference)             |                       |
| Yes                                                            | 15 / 24   | 0.72 (0.35 – 1.48)        |                       |
| <b>Posted motor vehicle speed</b> (on streets)                 |           |                           | not retained in model |
| No posted speed limit                                          | 16 / 19   | 1.12 (0.44 – 2.82)        |                       |
| 20 km/h                                                        | 2 / 1     | 2.08 (0.18 – 23.39)       |                       |
| 30 km/h                                                        | 17 / 13   | 1.58 (0.74 – 3.36)        |                       |
| 40 km/h                                                        | 17 / 26   | 0.86 (0.35 – 2.12)        |                       |
| 50 km/h                                                        | 158 / 211 | 1 (reference)             |                       |
| 60 km/h                                                        | 0 / 1     | 0 (0 - >1000)             |                       |
| 80 km/h                                                        | 0 / 1     | 0 (0 - >1000)             |                       |
| <b>Motor vehicle traffic per hour</b> (on streets)             |           |                           | not retained in model |
| 0                                                              | 7 / 6     | 1 (reference)             |                       |
| > 0 - 100                                                      | 23 / 44   | 0.37 (0.11 – 1.27)        |                       |
| > 100 - 500                                                    | 39 / 58   | 0.58 (0.17 – 1.90)        |                       |
| > 500 - 1000                                                   | 31 / 53   | 0.54 (0.17 – 1.78)        |                       |
| > 1000                                                         | 110 / 111 | 1.02 (0.33 – 3.16)        |                       |
| <b>Pedestrian traffic per hour</b> (on sidewalks or paths)     |           |                           | not retained in model |
| 0                                                              | 61 / 99   | 1 (reference)             |                       |
| > 0 - 25                                                       | 51 / 56   | 1.56 (0.93 – 2.63)        |                       |
| > 25 - 75                                                      | 43 / 37   | <b>2.22 (1.20 – 4.11)</b> |                       |
| > 75                                                           | 55 / 80   | 1.17 (0.66 – 2.08)        |                       |
| <b>Parked cars on cyclist's side of major or minor streets</b> |           |                           | not retained in model |
| No                                                             | 147 / 197 | 1 (reference)             |                       |
| Yes                                                            | 63 / 75   | 1.15 (0.72 – 1.84)        |                       |
| <b>Paved surface</b>                                           |           |                           | not retained in model |
| No                                                             | 0 / 0     | 1 (reference)             |                       |
| Yes                                                            | 210 / 272 | N/A (all paved)           |                       |

---

|                                                                                                                          |           |                                                                |                       |
|--------------------------------------------------------------------------------------------------------------------------|-----------|----------------------------------------------------------------|-----------------------|
| <b>Junctions</b> (driveways, alleys, laneways,<br>and bus stops within -100 m of site)                                   |           |                                                                | not retained in model |
| No                                                                                                                       | 33 / 45   | 1 (reference)                                                  |                       |
| Yes                                                                                                                      | 177 / 227 | 1.18 (0.68 – 2.05)                                             |                       |
| <b>Distance visible</b> (forward along route)                                                                            |           |                                                                | not retained in model |
| < 20 m                                                                                                                   | 1 / 2     | 0.50 (0.05 – 5.51)                                             |                       |
| ≥ 20 m                                                                                                                   | 209 / 270 | 1 (reference)                                                  |                       |
| <b>Street lights present</b>                                                                                             |           |                                                                | not retained in model |
| No                                                                                                                       | 4 / 0     | 1 (reference)                                                  |                       |
| Yes                                                                                                                      | 206 / 272 | 0 (0 - >1000)                                                  |                       |
| <b>Time of day</b>                                                                                                       |           |                                                                | not retained in model |
| Dawn, dusk, night                                                                                                        | 49 / 65   | N/A (values the same<br>at each injury &<br>control site pair) |                       |
| Day                                                                                                                      | 161 / 207 | 1 (reference)                                                  |                       |
| <b>Street lights present and time of day</b>                                                                             |           |                                                                | not retained in model |
| Dawn, dusk, night, no lights                                                                                             | 1 / 0     | >1000 (0 - >1000)                                              |                       |
| Dawn, dusk, night, with lights                                                                                           | 48 / 65   | N/A (values the same<br>at each injury &<br>control site pair) |                       |
| Day                                                                                                                      | 161 / 207 | 1 (reference)                                                  |                       |
| <b>Land use</b>                                                                                                          |           |                                                                | not retained in model |
| Local business, downtown business,<br>shopping mall, parking lot, transport<br>depot, industry or factory, institutional | 137 / 183 | 1.04 (0.62 – 1.76)                                             |                       |
| Residential                                                                                                              | 66 / 84   | 1 (reference)                                                  |                       |
| Park, waterway, agricultural, other                                                                                      | 7 / 5     | 1.93 (0.50 – 7.49)                                             |                       |

---

**Supplementary Data Table 2.** Associations between bicycling injury and infrastructural characteristics at non-intersection locations, comparison of N=478 injury sites and N=801 control sites, all at non-intersection locations. Odds ratios (OR) and 95% confidence intervals (CI) from logistic regression.

| Variable                                                       | # injury sites/<br># control sites | Each variable<br>considered<br>separately<br>OR (95% CI) | Multiple regression<br>model with all<br>significant variables<br>OR (95% CI) |
|----------------------------------------------------------------|------------------------------------|----------------------------------------------------------|-------------------------------------------------------------------------------|
| <b>Bike or pedestrian infrastructure</b>                       |                                    |                                                          |                                                                               |
| Traffic diverter on local street                               | 2 / 14                             | <b>0.06 (0.004 – 0.76)</b>                               | <b>0.04 (0.003 – 0.60)</b>                                                    |
| Cycle track                                                    | 2 / 17                             | <b>0.05 (0.004 – 0.52)</b>                               | <b>0.05 (0.01 – 0.59)</b>                                                     |
| Bike signage only                                              | 34 / 69                            | 0.74 (0.44 – 1.26)                                       | 0.70 (0.40 – 1.23)                                                            |
| Bike lane                                                      | 34 / 75                            | 0.63 (0.38 – 1.05)                                       | 0.86 (0.50 – 1.47)                                                            |
| Bike path                                                      | 21 / 44                            | 0.78 (0.33 – 1.82)                                       | 0.88 (0.37 – 2.10)                                                            |
| Not in any of above categories                                 | 231 / 371                          | 1 (reference)                                            | 1 (reference)                                                                 |
| Traffic slowing device on local street                         | 26 / 34                            | 1.13 (0.57 – 2.24)                                       | 1.23 (0.61 – 2.51)                                                            |
| Multi-use path                                                 | 74 / 114                           | 1.11 (0.67 – 1.83)                                       | 1.14 (0.68 – 1.93)                                                            |
| Sidewalk                                                       | 38 / 49                            | 1.42 (0.81 – 2.51)                                       | 1.54 (0.84 – 2.79)                                                            |
| Sharrows or shared lane                                        | 16 / 14                            | 2.07 (0.84 – 5.14)                                       | 1.99 (0.76 – 5.20)                                                            |
| <b>Route grade (in the direction of cyclist travel)</b>        |                                    |                                                          |                                                                               |
| Uphill ( $\geq 1^\circ$ )                                      | 88 / 162                           | 1.30 (0.91 – 1.85)                                       | 1.40 (0.96 – 2.06)                                                            |
| Flat                                                           | 177 / 373                          | 1 (reference)                                            | 1 (reference)                                                                 |
| Downhill ( $\leq -1^\circ$ )                                   | 213 / 266                          | <b>2.00 (1.48 – 2.71)</b>                                | <b>2.05 (1.48 – 2.85)</b>                                                     |
| <b>Streetcar or train tracks (within 5 m diameter of site)</b> |                                    |                                                          |                                                                               |
| No                                                             | 376 / 700                          | 1 (reference)                                            | 1 (reference)                                                                 |
| Yes                                                            | 102 / 101                          | <b>4.34 (2.49 – 7.55)</b>                                | <b>4.15 (2.31 – 7.45)</b>                                                     |
| <b>Construction present</b>                                    |                                    |                                                          |                                                                               |
| No                                                             | 408 / 746                          | 1 (reference)                                            | 1 (reference)                                                                 |
| Yes                                                            | 70 / 55                            | <b>2.74 (1.81 – 4.14)</b>                                | <b>2.67 (1.70 – 4.19)</b>                                                     |
| <b>Route type</b>                                              |                                    |                                                          |                                                                               |
| Major                                                          | 178 / 262                          | 1 (reference)                                            | not retained in model                                                         |
| Minor                                                          | 55 / 93                            | 0.82 (0.52 – 1.28)                                       |                                                                               |
| Local                                                          | 110 / 222                          | <b>0.64 (0.41 – 0.98)</b>                                |                                                                               |
| Separated                                                      | 135 / 224                          | 0.97 (0.62 – 1.52)                                       |                                                                               |
| <b>Motor vehicle speed (on streets)</b>                        |                                    |                                                          |                                                                               |
| $\leq 30$ km/h                                                 | 226 / 389                          | 1 (reference)                                            | not retained in model                                                         |
| $> 30$ to $50$ km/h                                            | 229 / 363                          | 0.96 (0.72 – 1.28)                                       |                                                                               |
| $> 50$ to $60$ km/h                                            | 13 / 37                            | 0.53 (0.26 – 1.08)                                       |                                                                               |
| $> 60$ km/h                                                    | 7 / 12                             | 0.93 (0.32 – 2.67)                                       |                                                                               |
| <b>Posted motor vehicle speed (on streets)</b>                 |                                    |                                                          |                                                                               |
| No posted speed                                                | 135 / 224                          | 1.37 (0.94 – 2.00)                                       | not retained in model                                                         |
| 20 km/h                                                        | 14 / 11                            | <b>3.04 (1.11 – 8.31)</b>                                |                                                                               |
| 30 km/h                                                        | 23 / 37                            | 1.34 (0.73 – 2.45)                                       |                                                                               |
| 40 km/h                                                        | 48 / 71                            | 1.45 (0.83 – 2.53)                                       |                                                                               |

|                                                                                     |           |                           |                       |
|-------------------------------------------------------------------------------------|-----------|---------------------------|-----------------------|
| 50 km/h                                                                             | 254 / 451 | 1 (reference)             |                       |
| 60 km/h                                                                             | 2 / 5     | 0.76 (0.15 – 4.01)        |                       |
| 80 km/h                                                                             | 1 / 2     | 1.09 (0.06 – 21.54)       |                       |
| 90 km/h                                                                             | 1 / 0     | >1000 (0 - >1000)         |                       |
| <b>Motor vehicle traffic per hour (on streets)</b>                                  |           |                           | not retained in model |
| 0                                                                                   | 156 / 250 | <b>1.43 (1.01 – 2.04)</b> |                       |
| > 0 - 100                                                                           | 64 / 147  | 1 (reference)             |                       |
| > 100 - 500                                                                         | 71 / 111  | 1.47 (0.97 – 2.23)        |                       |
| > 500 - 1000                                                                        | 98 / 162  | 1.39 (0.94 – 2.04)        |                       |
| > 1000                                                                              | 89 / 131  | <b>1.56 (1.05 – 2.32)</b> |                       |
| <b>Cyclist travel direction</b>                                                     |           |                           | not retained in model |
| Same as motor vehicle traffic                                                       | 452 / 754 | 1 (reference)             |                       |
| Opposite to motor vehicle traffic                                                   | 26 / 47   | 0.97 (0.54 – 1.74)        |                       |
| <b>Cyclist traffic per hour</b>                                                     |           |                           | not retained in model |
| 0                                                                                   | 141 / 262 | 1 (reference)             |                       |
| > 0 - 25                                                                            | 128 / 195 | 1.25 (0.89 – 1.76)        |                       |
| > 25 - 75                                                                           | 103 / 151 | 1.24 (0.85 – 1.82)        |                       |
| > 75                                                                                | 106 / 193 | 0.94 (0.61 – 1.45)        |                       |
| <b>Pedestrian traffic per hour (on sidewalks or paths)</b>                          |           |                           | not retained in model |
| 0                                                                                   | 393 / 662 | 1 (reference)             |                       |
| > 0 - 25                                                                            | 24 / 50   | 0.93 (0.55 – 1.59)        |                       |
| > 25 - 75                                                                           | 23 / 42   | 1.06 (0.57 – 1.95)        |                       |
| > 75                                                                                | 38 / 47   | 1.66 (0.96 – 2.84)        |                       |
| <b>Parked cars on cyclist's side of major or minor streets</b>                      |           |                           | not retained in model |
| No                                                                                  | 353 / 628 | 1 (reference)             |                       |
| Yes                                                                                 | 125 / 173 | 1.21 (0.88 – 1.67)        |                       |
| <b>Paved surface</b>                                                                |           |                           | not retained in model |
| No                                                                                  | 15 / 24   | 1 (reference)             |                       |
| Yes                                                                                 | 463 / 777 | 0.89 (0.34 – 2.31)        |                       |
| <b>Junctions (driveways, alleys, laneways, and bus stops within -100 m of site)</b> |           |                           | not retained in model |
| No                                                                                  | 57 / 107  | 1 (reference)             |                       |
| Yes                                                                                 | 420 / 694 | 1.11 (0.77 – 1.62)        |                       |
| <b>Distance visible (forward along route)</b>                                       |           |                           | not retained in model |
| < 20 m                                                                              | 11 / 13   | 1.42 (0.63 – 3.20)        |                       |
| ≥ 20 m                                                                              | 467 / 788 | 1 (reference)             |                       |
| <b>Street lights present</b>                                                        |           |                           | not retained in model |
| No                                                                                  | 61 / 95   | 1 (reference)             |                       |
| Yes                                                                                 | 417 / 706 | 0.77 (0.49 – 1.20)        |                       |

|                                                                                                                          |           |                           |                       |
|--------------------------------------------------------------------------------------------------------------------------|-----------|---------------------------|-----------------------|
| <b>Time of day</b>                                                                                                       |           |                           | not retained in model |
| Dawn, dusk, night                                                                                                        | 105 / 179 | 3.31 (0.61 – 17.95)       |                       |
| Day                                                                                                                      | 373 / 622 | 1 (reference)             |                       |
| <b>Street lights present and time of day</b>                                                                             |           |                           | not retained in model |
| Dawn, dusk, night, no lights                                                                                             | 8 / 17    | 2.86 (0.48 – 17.22)       |                       |
| Dawn, dusk, night, with lights                                                                                           | 97 / 162  | 3.65 (0.64 – 20.80)       |                       |
| Day                                                                                                                      | 373 / 622 | 1 (reference)             |                       |
| <b>Land use</b>                                                                                                          |           |                           | not retained in model |
| Local business, downtown business,<br>shopping mall, parking lot, transport<br>depot, industry or factory, institutional | 317 / 494 | <b>1.44 (1.10 – 2.05)</b> |                       |
| Residential                                                                                                              | 81 / 175  | 1 (reference)             |                       |
| Park, waterway, agricultural, other                                                                                      | 80 / 132  | 1.56 (0.96 – 2.54)        |                       |
